# Supplementary figures and images for: Biotinidase Deficiency: The First Reported Case from Nepal
Source: Research Square preprint supplement (doi:10.21203/rs.3.rs-5762621/v1), 2025-04-03

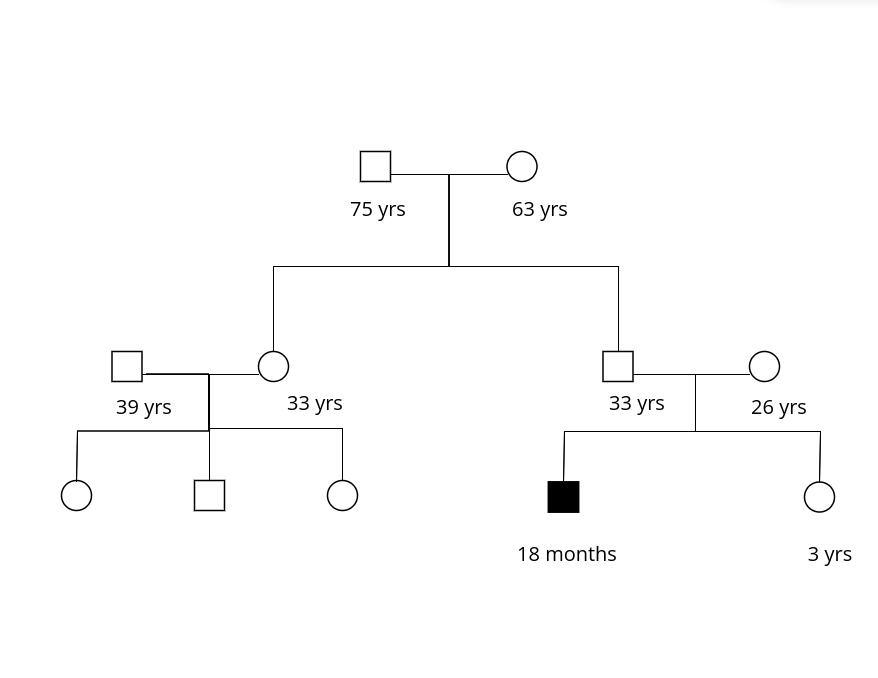


Pedigree Chart:


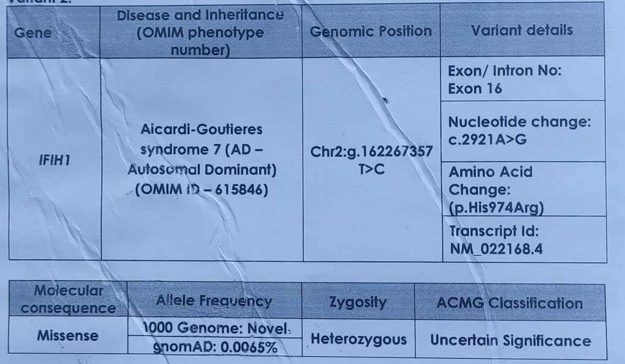

Supplement: Supplementary file 1 [file 47af82b82e09daad2337c99c.docx]
